# Supplementary material for: Controllable synthesis of two different morphologies of Cu2O particles with the assistance of carbon dots
Source: Royal Society of Chemistry journal article supplement (doi:10.1039/c3ra48007k), 2014-01-01

Figure S1. UV-vis absorption spectrum of the CQDs obtained at different centrifuge speeds.

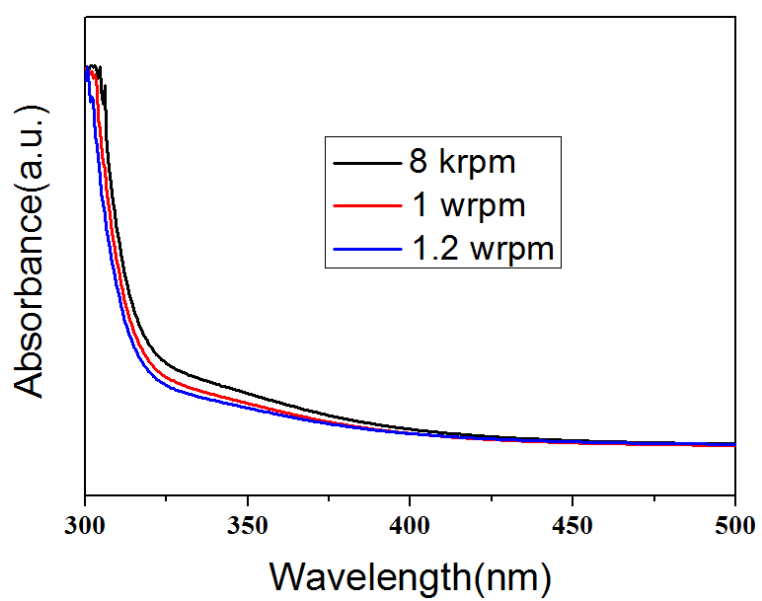

Figure S2. Emission spectra of the CQDs at different excitation wavelengths.

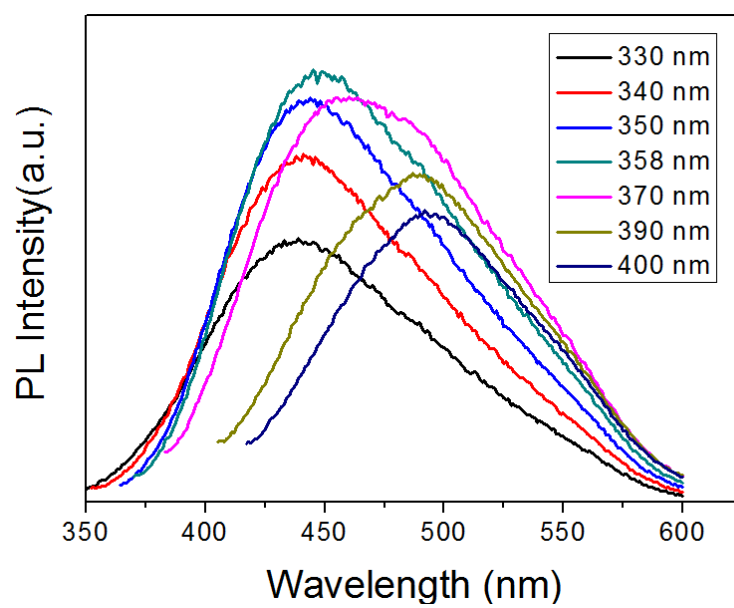

Figure S3. FT-IR spectrum of CQDs and Cu<sub>2</sub>O particles /C-dots.

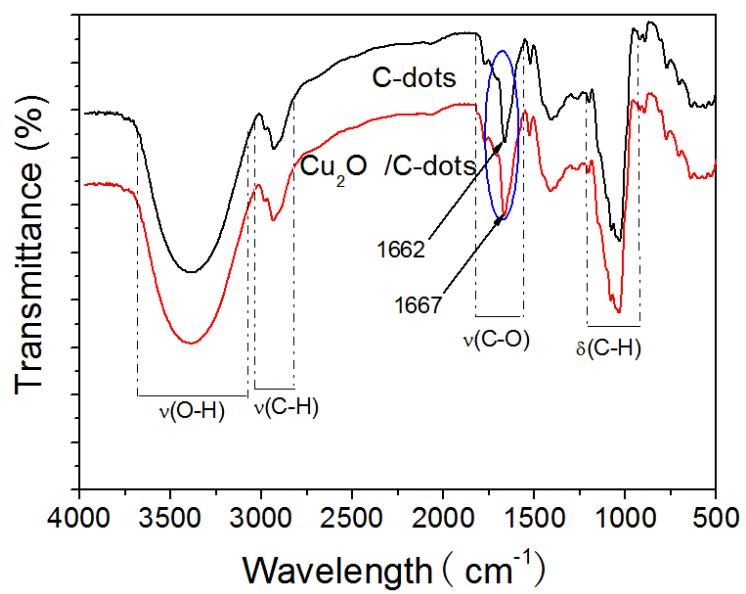

Figure S4. SEM images of the  $\text{Cu}_2\text{O}$  particles without the presence of CQDs.

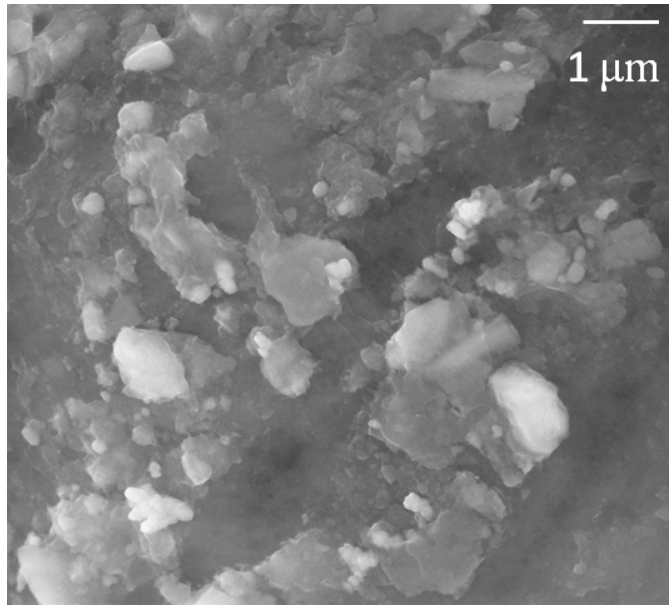

Supplement: c3ra48007k1.pdf [file c3ra48007k1.pdf]
